# Supplementary material for: Osteoblasts contribute to a protective niche that supports melanoma cell proliferation and survival
Source: PubMed Central journal article supplement (PMC6972519; doi:10.1111/pcmr.12812), 2019-08-08
Supplement: PCMR-33-74-s001.pdf [file PCMR-33-74-s001.pdf]

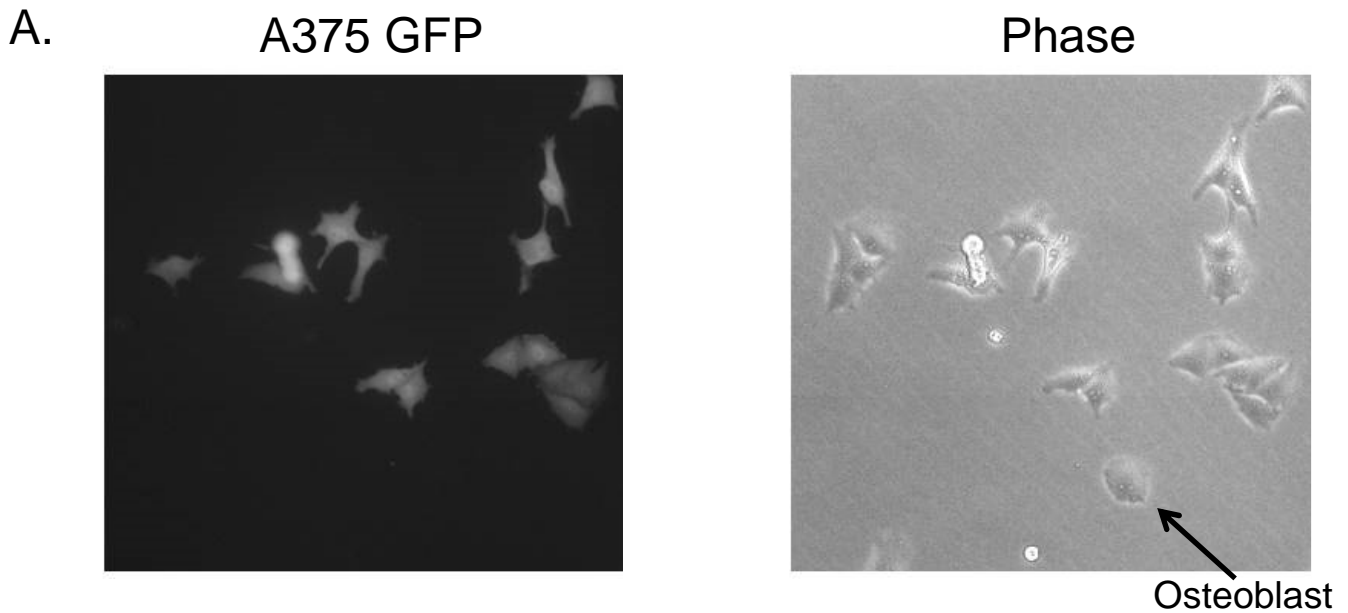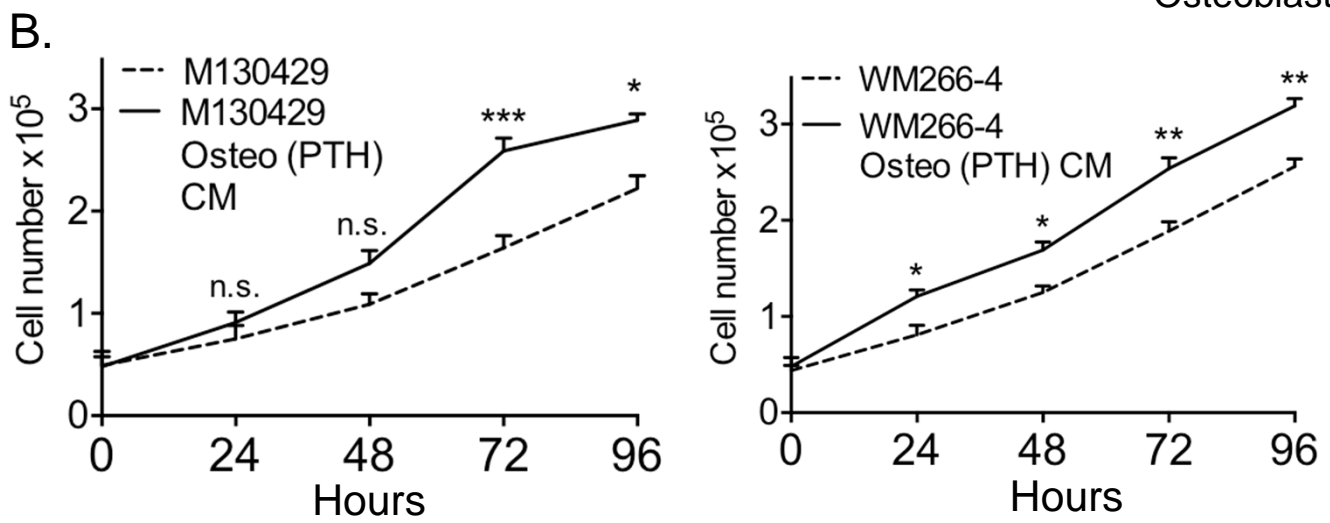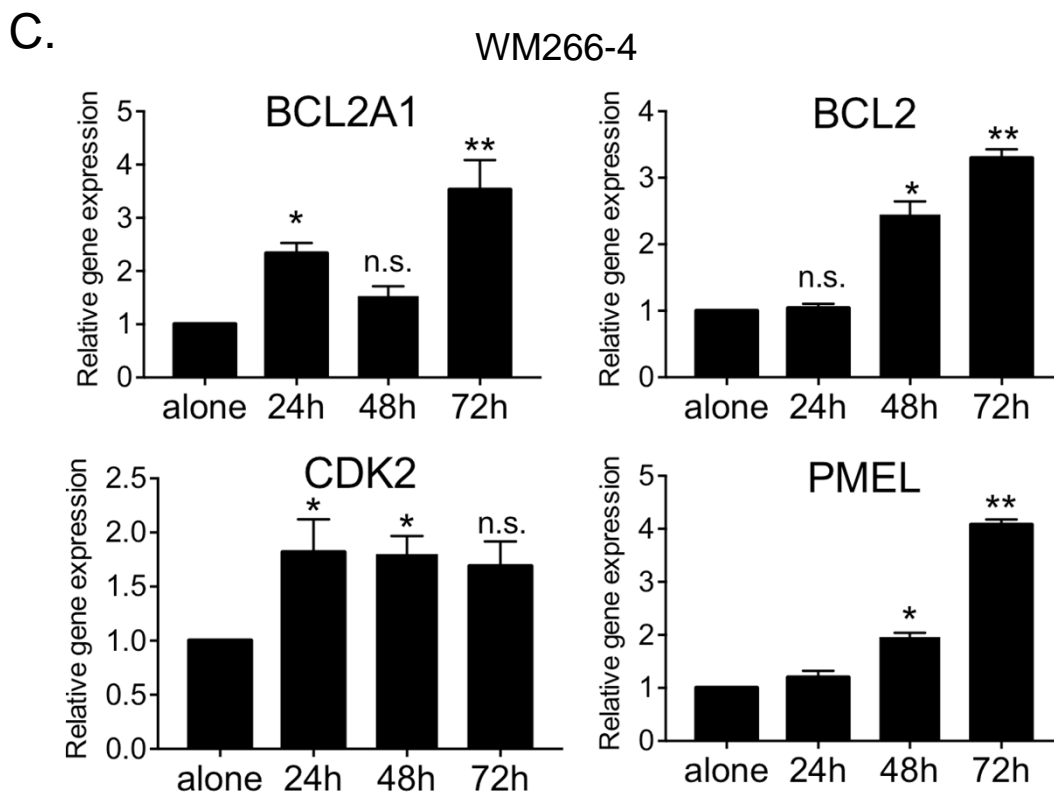

**Supplemental Figure 1: Additional osteoblast induced changes to melanoma**

A.

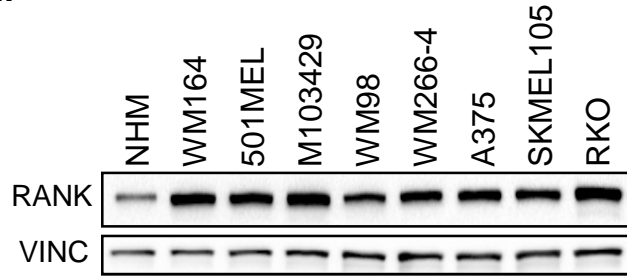

B.

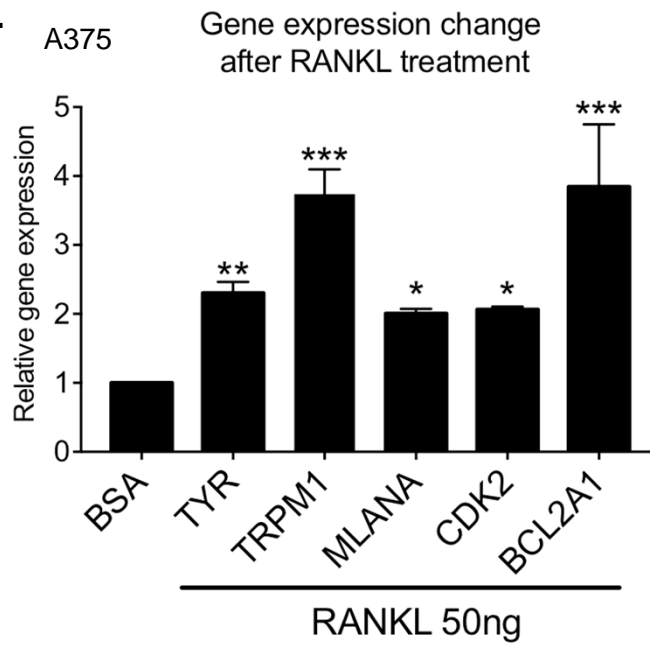

Supplemental Figure 2: Additional effects of RANKL on MITF target genes

A.

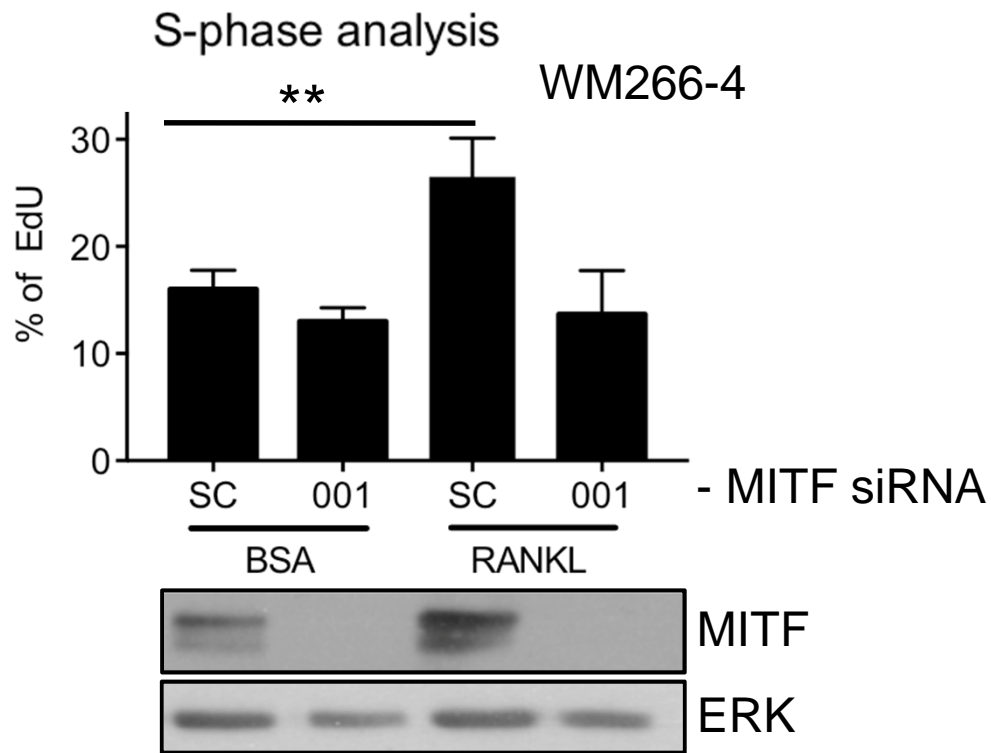

Supplemental Figure 3: MITF drives RANKL induced proliferation

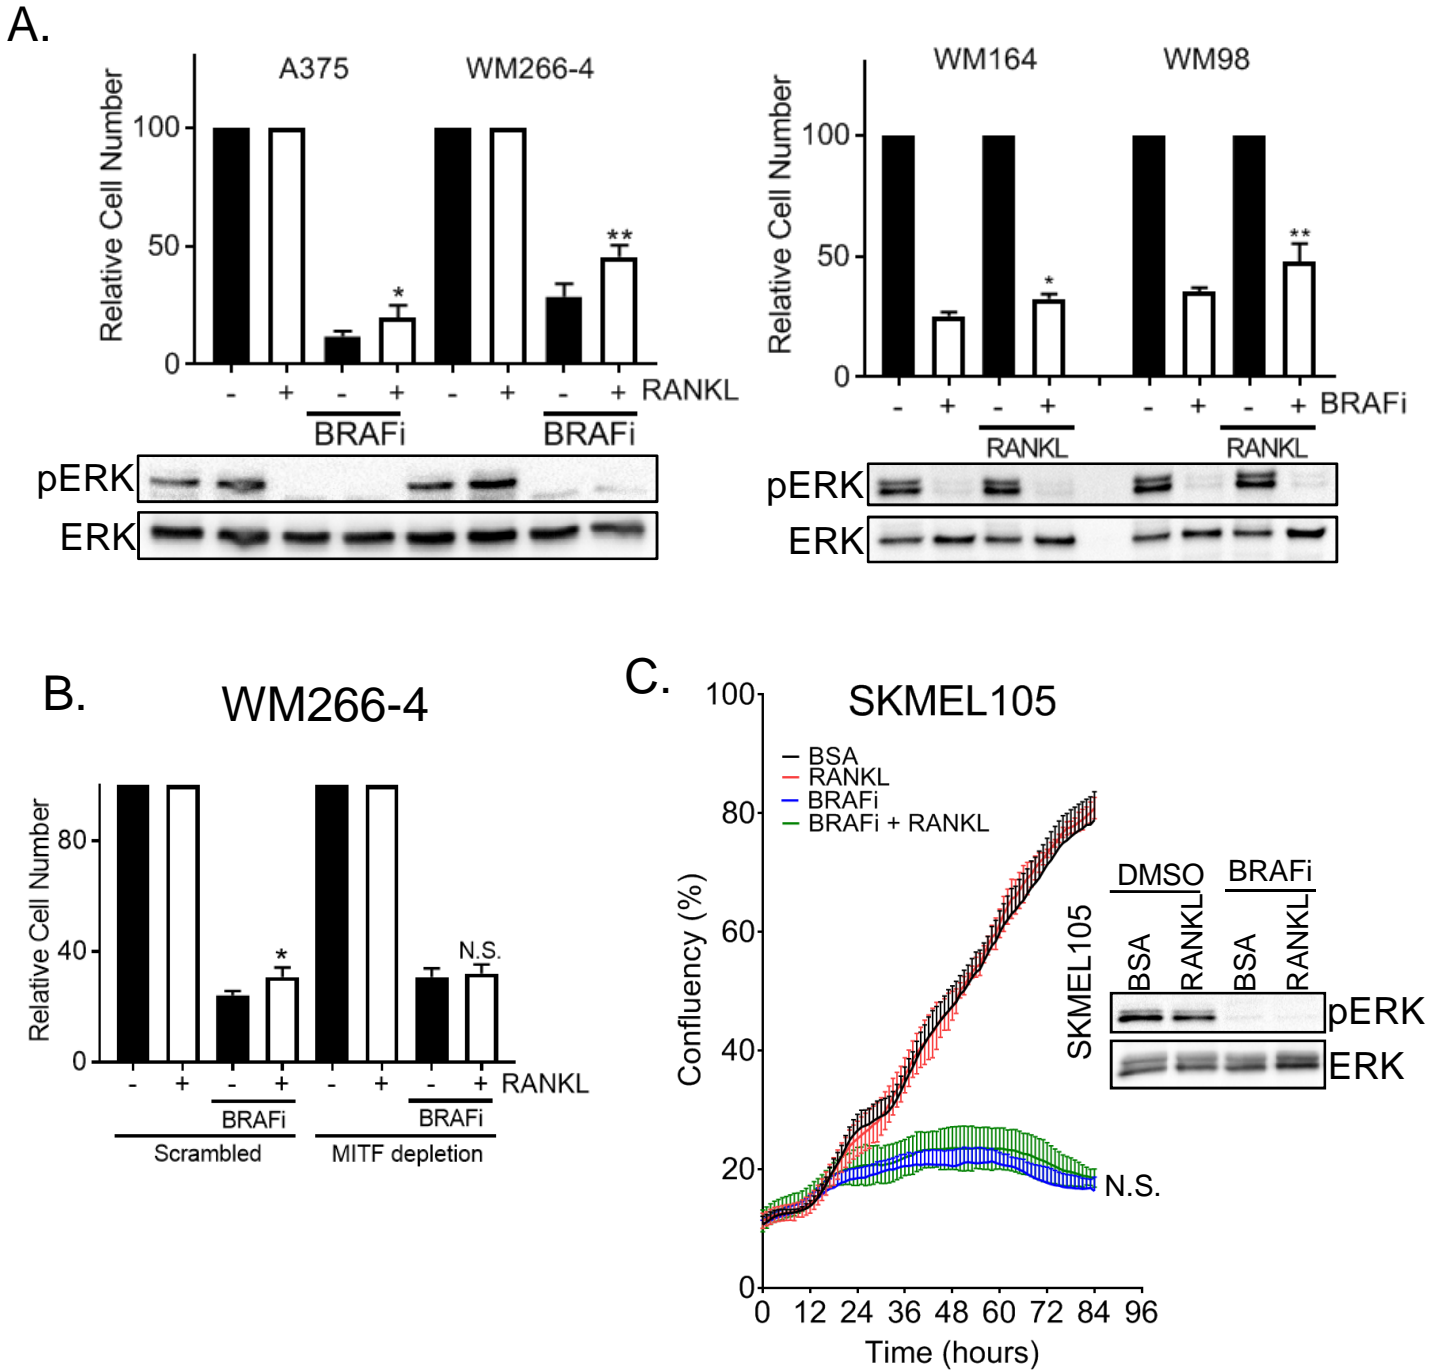

**Supplemental Figure 4: Additional changes of sensitivity to BRAF inhibition in BRAF mutant cells**

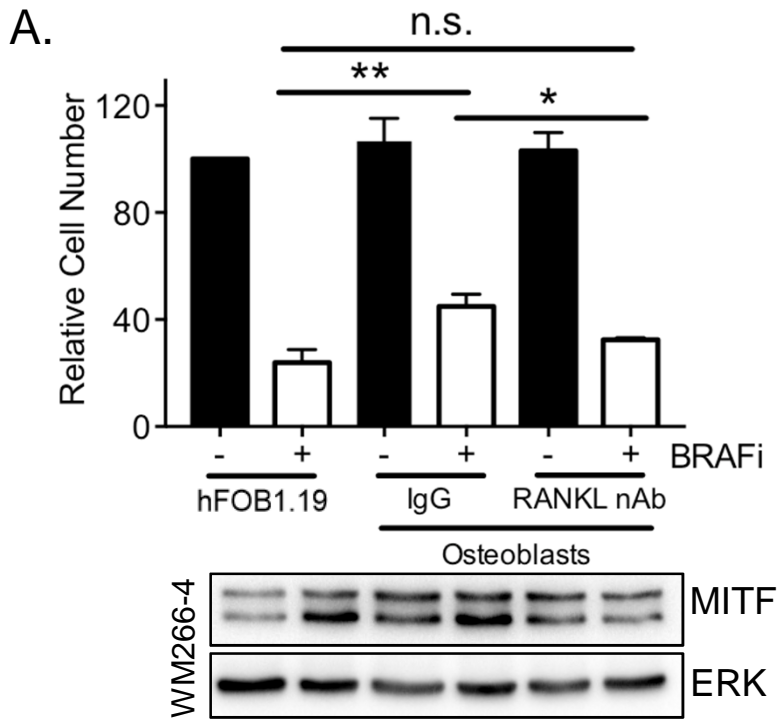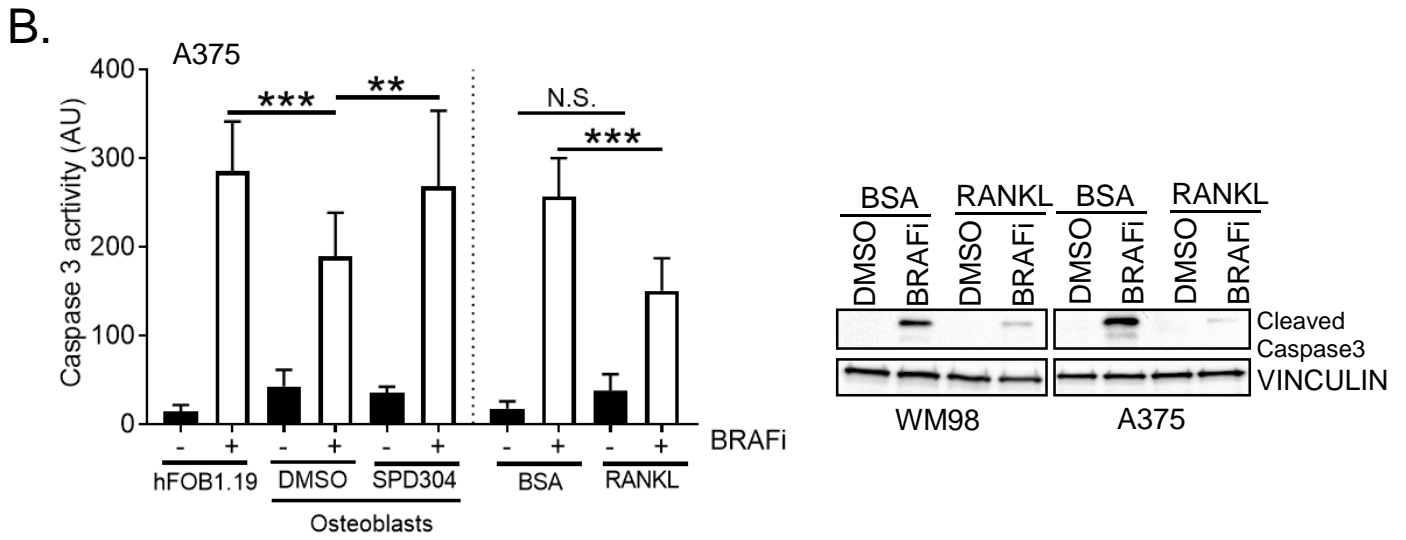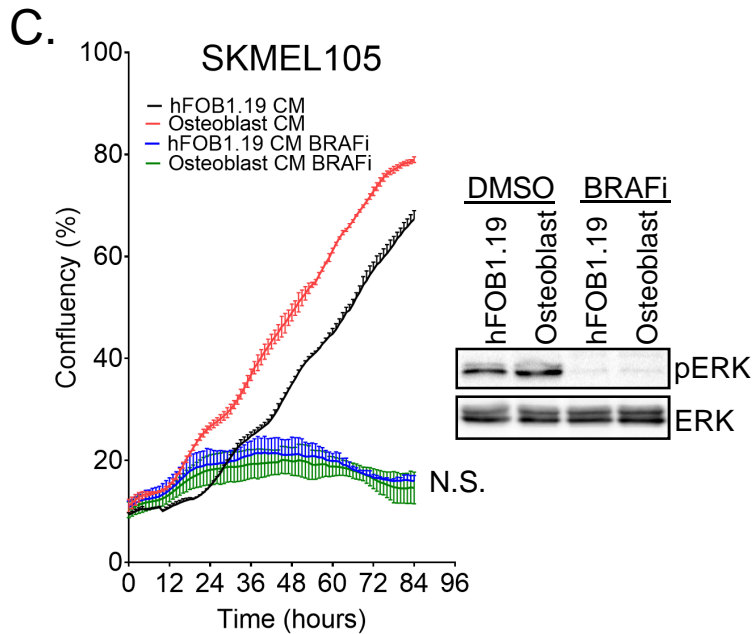

**Supplemental Figure 5: Additional osteoblast-melanoma co-culture survival data**
